# Supplementary material
Source: HighWire-hosted journal article supplement (https://bmjopen.bmj.com/content/6/3/e010605)
Supplement: inline-supplementary-material-3 [file inline-supplementary-material-3.pdf]

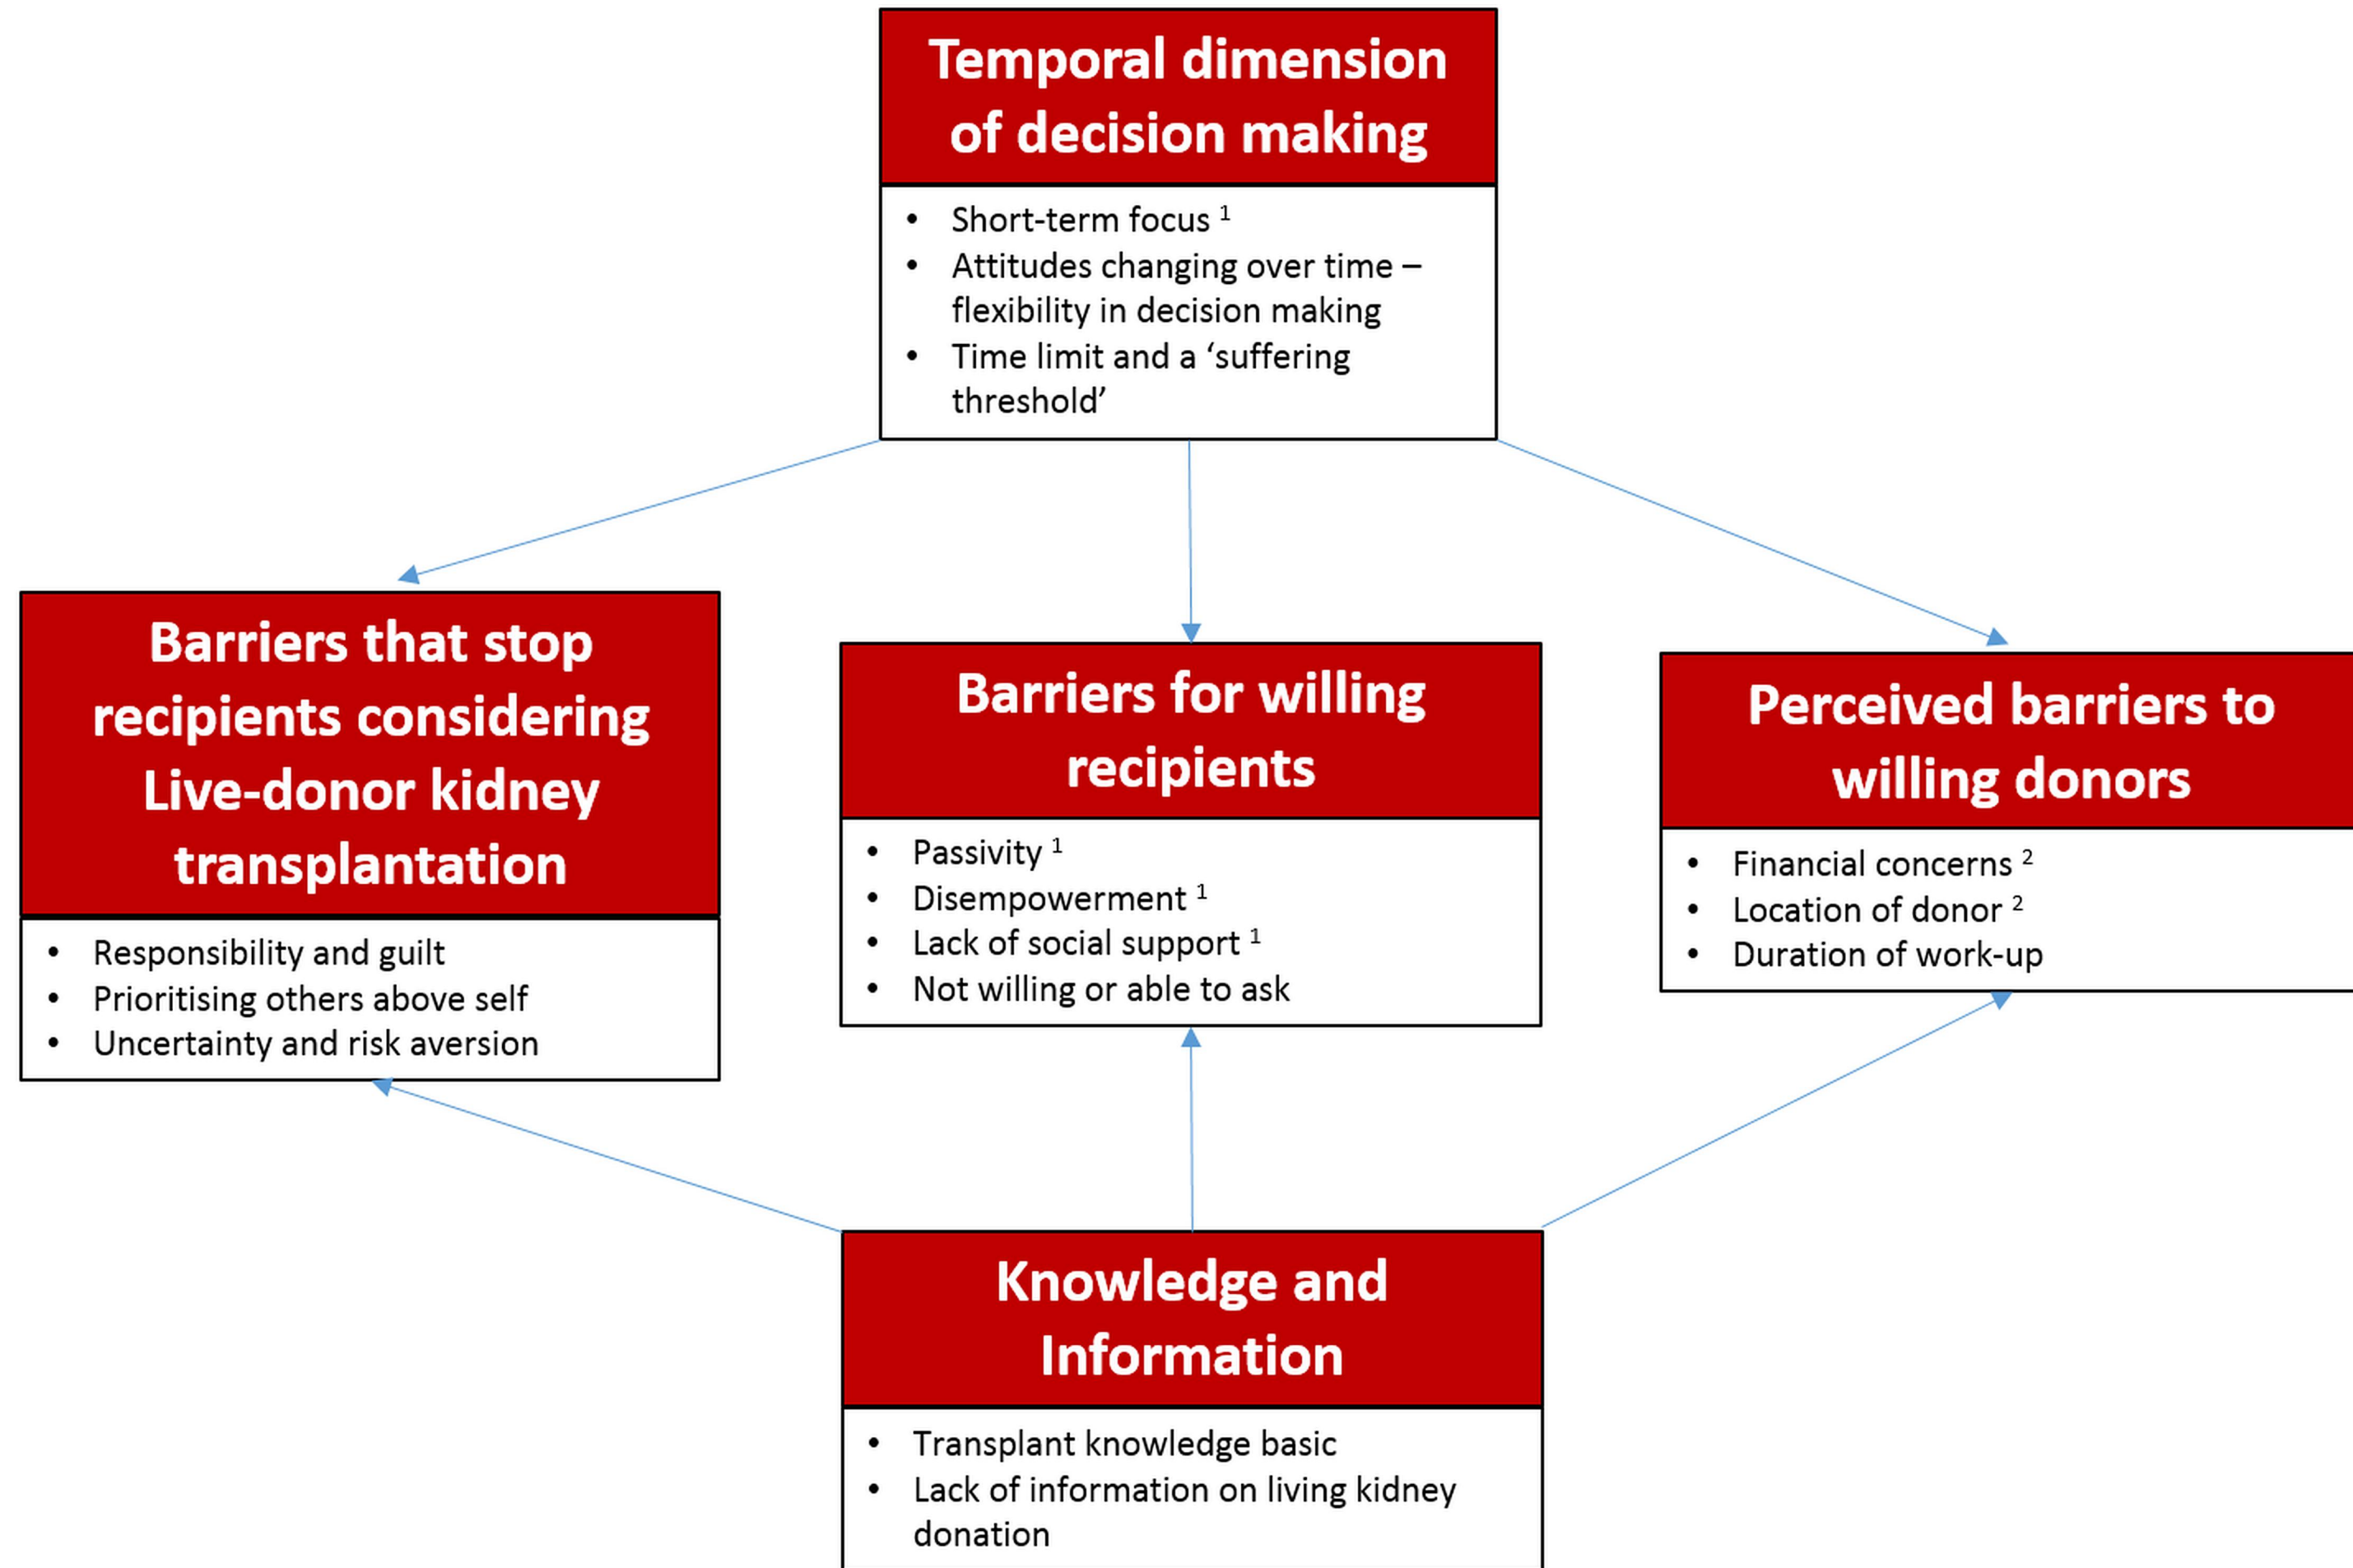

**Figure 1: Thematic schema of barriers to live-donor kidney transplantation – demonstrating each step towards live-donor kidney transplantation**

<sup>1</sup> Theme identified almost exclusively in interviews with individuals from areas of high socioeconomic deprivation

<sup>2</sup> Theme identified almost exclusively in interviews with individuals from areas of low socioeconomic deprivation.
