# Supplementary material
Source: HighWire-hosted journal article supplement (https://bmjopen.bmj.com/content/6/3/e010605)
Supplement: inline-supplementary-material-4 [file inline-supplementary-material-4.pdf]

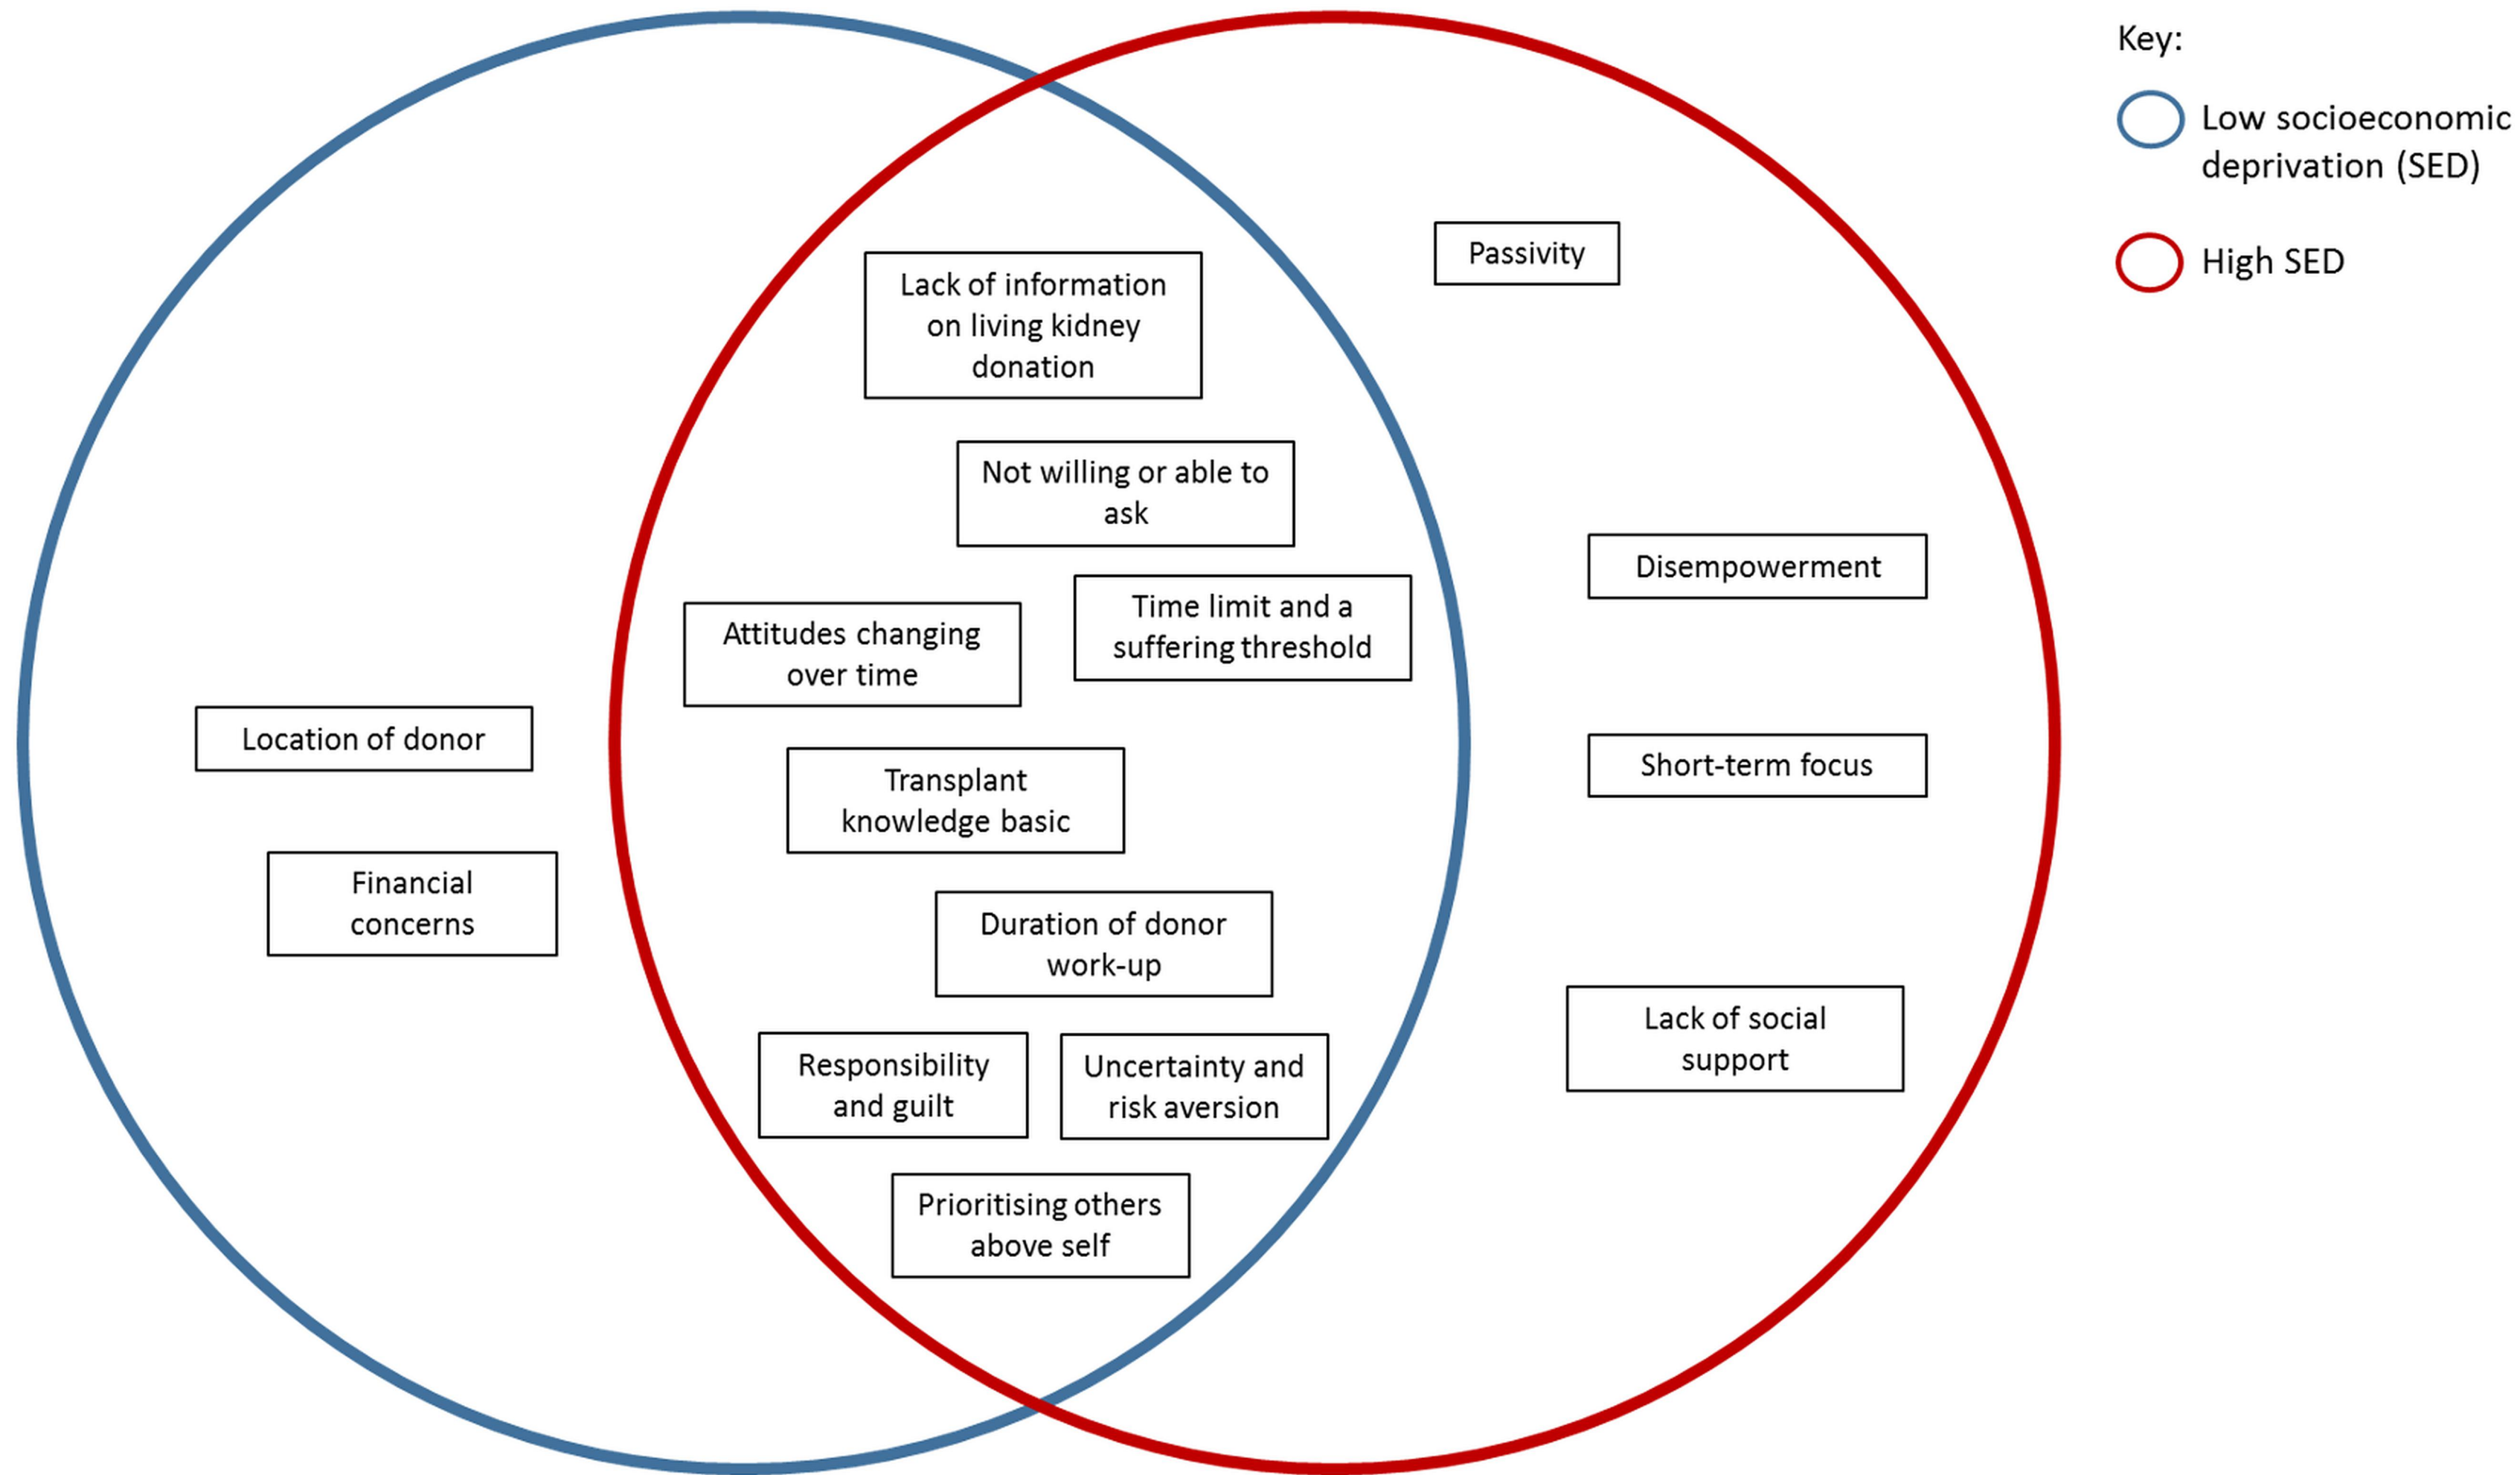

**Figure 2: Themes by level of socioeconomic deprivation**
